# Supplementary material for: Exploratory Systematic Review of Mixed Martial Arts: An Overview of Performance of Importance Factors with over 20,000 Athletes
Source: MDPI journal article supplement (doi:10.3390/sports10060080), 2022-05-24
Supplement: s1 [file s1]

**Table S1:** Risk of bias assessment criteria

| Criteria |                         | Definition                                                           | Scoring |        |     |
|----------|-------------------------|----------------------------------------------------------------------|---------|--------|-----|
|          |                         |                                                                      | 0       | 1      | 2   |
| A        | Peer reviewed           | Study published in peer-reviewed journal                             | No      | Yes    | -   |
| B        | Number of participants  | Number of participants included in study findings                    | <5      | 6-30   | >31 |
| C        | Population defined      | Age, sex, sport, time experience (or level) was described            | No      | Partly | Yes |
| D        | Experimental design     | Experimental design of the study period was described and replicable | No      | Partly | Yes |
| E        | MMA athlete information | MMA athlete parameters were described                                | No      | Yes    | -   |
