# Supplementary material for: Exploratory Systematic Review of Mixed Martial Arts: An Overview of Performance of Importance Factors with over 20,000 Athletes
Source: MDPI journal article supplement (doi:10.3390/sports10060080), 2022-05-24
Supplement: s1 [file s1]

**Table S2: Risk of bias assessment criteria and application in the studies**

| Criteria |                         | Definition                                                           | Scoring |        |     |
|----------|-------------------------|----------------------------------------------------------------------|---------|--------|-----|
|          |                         |                                                                      | 0       | 1      | 2   |
| A        | Peer reviewed           | Study published in peer-reviewed journal                             | No      | Yes    | -   |
| B        | Number of participants  | Number of participants included in study findings                    | <5      | 6-30   | >31 |
| C        | Population defined      | Age, gender, sport, time experience (or level) was described         | No      | Partly | Yes |
| D        | Experimental design     | Experimental design of the study period was described and replicable | No      | Partly | Yes |
| E        | MMA athlete information | MMA athlete parameters were described                                | No      | Yes    | -   |

| Study                            | A | B | C | D | E | TOTAL |
|----------------------------------|---|---|---|---|---|-------|
| Alves et al., 2018               | 1 | 2 | 2 | 2 | 1 | 8     |
| Amtmann et al., 2004             | 1 | 1 | 1 | 1 | 1 | 5     |
| Amtmann et al., 2008             | 1 | 1 | 1 | 1 | 1 | 5     |
| Andreato et al., 2014            | 1 | 1 | 1 | 1 | 1 | 5     |
| Antonietto et al., 2019          | 1 | 2 | 1 | 2 | 1 | 7     |
| Azevedo et al., 2019             | 1 | 1 | 2 | 2 | 1 | 7     |
| Aung et al., 2021                | 1 | 2 | 1 | 1 | 1 | 6     |
| Barley et al., 2018 <sup>a</sup> | 1 | 2 | 2 | 1 | 1 | 7     |
| Barley et al., 2018 <sup>b</sup> | 1 | 2 | 2 | 2 | 1 | 8     |
| Barley et al., 2018 <sup>c</sup> | 1 | 2 | 2 | 1 | 1 | 7     |
| Bernick et al., 2021             | 1 | 1 | 1 | 1 | 1 | 5     |
| Buse et al., 2006                | 1 | 2 | 1 | 2 | 1 | 7     |
| Bledsoe et al., 2006             | 1 | 2 | 1 | 1 | 0 | 5     |

|                                  |   |   |   |   |   |   |
|----------------------------------|---|---|---|---|---|---|
| Bodden et al., 2015              | 1 | 1 | 2 | 1 | 1 | 6 |
| Brandt et al., 2018              | 1 | 1 | 2 | 2 | 1 | 7 |
| Bray et al., 2021                | 1 | 2 | 2 | 2 | 1 | 8 |
| Brechney et al., 2019            | 1 | 2 | 2 | 2 | 1 | 8 |
| Brito et al., 2018               | 1 | 2 | 1 | 2 | 1 | 7 |
| Camarço et al., 2016             | 1 | 0 | 2 | 2 | 1 | 6 |
| Chen & Cheesman., 2013           | 1 | 2 | 1 | 2 | 1 | 7 |
| Cherepkova et al., 2019          | 1 | 2 | 2 | 2 | 1 | 8 |
| Chernozub et al., 2018           | 1 | 1 | 2 | 2 | 1 | 7 |
| Chernozub et al., 2019           | 1 | 2 | 1 | 1 | 1 | 6 |
| Connor & Egan., 2019             | 1 | 1 | 1 | 1 | 1 | 5 |
| Connor, Shelley & Egan., 2020    | 1 | 1 | 2 | 2 | 1 | 7 |
| Connor & Egan., 2021             | 1 | 1 | 2 | 2 | 1 | 7 |
| Coswig et al., 2015              | 1 | 1 | 2 | 1 | 1 | 6 |
| Coswig et al., 2016 <sup>a</sup> | 1 | 1 | 1 | 2 | 1 | 6 |
| Coswig et al., 2016 <sup>b</sup> | 1 | 1 | 1 | 2 | 1 | 6 |
| Coswig et al., 2019              | 1 | 1 | 2 | 2 | 1 | 7 |
| Curran-Sills & Abedin, 2018      | 1 | 2 | 2 | 2 | 1 | 8 |
| Dal Bello et al., 2019           | 1 | 2 | 1 | 2 | 1 | 7 |
| De Souza et al., 2017            | 1 | 1 | 2 | 1 | 1 | 6 |
| Del Vecchio et al., 2011         | 1 | 2 | 2 | 2 | 1 | 8 |
| Dixson et al., 2018              | 1 | 2 | 2 | 1 | 1 | 7 |
| Dos Santos et al., 2018          | 1 | 2 | 1 | 1 | 1 | 6 |
| Fares et al., 2019               | 1 | 2 | 2 | 2 | 1 | 8 |
| Fares et al., 2021 <sup>a</sup>  | 1 | 2 | 1 | 2 | 1 | 7 |

|                                      |   |   |   |   |   |   |
|--------------------------------------|---|---|---|---|---|---|
| Fares et al., 2021 <sup>b</sup>      | 1 | 2 | 2 | 2 | 1 | 8 |
| Faro, Lima-Junior & Machado,<br>2021 | 1 | 2 | 1 | 2 | 1 | 7 |
| Fernandes et al., 2018               | 1 | 2 | 2 | 2 | 1 | 8 |
| Follmer et al., 2019                 | 1 | 2 | 1 | 1 | 1 | 6 |
| Follmer, Andreato & Coswig., 2021    | 1 | 2 | 1 | 2 | 1 | 7 |
| Fliotsos et al., 2021                | 1 | 2 | 1 | 2 | 1 | 7 |
| Ghoul et al., 2019                   | 1 | 1 | 2 | 2 | 1 | 7 |
| Giboin & Gruber, 2019                | 1 | 1 | 2 | 2 | 1 | 7 |
| Gomes-Santos et al., 2022            | 1 | 1 | 2 | 1 | 1 | 6 |
| Heath & Callahan, 2013               | 1 | 2 | 2 | 1 | 1 | 7 |
| Hillier et al., 2019                 | 1 | 2 | 2 | 2 | 1 | 8 |
| Hubbard et al., 2019                 | 1 | 2 | 2 | 2 | 1 | 8 |
| Hutchison et al., 2014               | 1 | 2 | 1 | 2 | 1 | 7 |
| Ignatjeva et al., 2021               | 1 | 2 | 1 | 2 | 1 | 7 |
| James et al., 2017 <sup>a</sup>      | 1 | 2 | 2 | 2 | 1 | 8 |
| James et al., 2017 <sup>b</sup>      | 1 | 1 | 2 | 2 | 1 | 7 |
| James et al., 2018                   | 1 | 2 | 2 | 2 | 1 | 8 |
| James et al., 2020                   | 1 | 1 | 2 | 2 | 1 | 7 |
| Jansen et al., 2021                  | 1 | 1 | 1 | 1 | 1 | 5 |
| Jetton et al., 2013                  | 1 | 2 | 2 | 2 | 1 | 8 |
| Ji, 2016                             | 1 | 2 | 2 | 1 | 1 | 7 |
| Kasper et al., 2019                  | 1 | 0 | 2 | 1 | 1 | 5 |
| Kirk et al., 2015                    | 1 | 1 | 2 | 2 | 1 | 7 |
| Kirk et al., 2021                    | 1 | 1 | 2 | 1 | 1 | 6 |

|                                  |   |   |   |   |   |   |
|----------------------------------|---|---|---|---|---|---|
| Kostikiadis et al., 2018         | 1 | 1 | 2 | 2 | 1 | 7 |
| Khatib et al., 2021              | 1 | 2 | 1 | 1 | 1 | 6 |
| Kingery et al., 2021             | 1 | 2 | 2 | 2 | 1 | 8 |
| Landers et al., 2017             | 1 | 1 | 2 | 2 | 1 | 7 |
| LaRocca et al., 2019             | 1 | 2 | 2 | 2 | 1 | 8 |
| Lindsay et al., 2015             | 1 | 1 | 1 | 2 | 1 | 6 |
| Lindsay et al., 2017             | 1 | 1 | 1 | 2 | 1 | 6 |
| Little et al., 2015              | 1 | 2 | 2 | 2 | 1 | 8 |
| Marinho et al., 2016             | 1 | 1 | 2 | 2 | 1 | 7 |
| Matuk et al., 2021               | 1 | 1 | 1 | 1 | 1 | 5 |
| Massey et al., 2013              | 1 | 1 | 1 | 2 | 1 | 6 |
| Matthews & Nicholas, 2017        | 1 | 1 | 1 | 2 | 1 | 6 |
| Mayer et al., 2015               | 1 | 1 | 1 | 2 | 1 | 6 |
| Mayer et al., 2017               | 1 | 1 | 2 | 2 | 1 | 7 |
| McClain et al., 2014             | 1 | 2 | 1 | 1 | 1 | 6 |
| Miarka et al., 2015              | 1 | 2 | 1 | 1 | 1 | 6 |
| Miarka et al., 2016 <sup>a</sup> | 1 | 2 | 1 | 2 | 1 | 7 |
| Miarka et al., 2016 <sup>b</sup> | 1 | 2 | 2 | 2 | 1 | 8 |
| Miarka et al., 2016 <sup>c</sup> | 1 | 2 | 1 | 2 | 1 | 7 |
| Miarka et al., 2017 <sup>a</sup> | 1 | 2 | 1 | 2 | 1 | 7 |
| Miarka et al., 2017 <sup>b</sup> | 1 | 2 | 1 | 2 | 1 | 7 |
| Miarka et al., 2018 <sup>a</sup> | 1 | 2 | 2 | 2 | 1 | 8 |
| Miarka et al., 2018 <sup>b</sup> | 1 | 2 | 2 | 2 | 1 | 8 |
| Miarka et al., 2019 <sup>a</sup> | 1 | 2 | 1 | 2 | 1 | 7 |
| Miarka et al., 2019 <sup>b</sup> | 1 | 2 | 2 | 2 | 1 | 8 |

|                                                |   |   |   |   |   |   |
|------------------------------------------------|---|---|---|---|---|---|
| Miarka et al., 2021                            | 1 | 1 | 1 | 1 | 1 | 5 |
| Murugappan et al., 2021                        | 1 | 1 | 1 | 1 | 1 | 5 |
| Ngai et al., 2008                              | 1 | 2 | 1 | 2 | 1 | 7 |
| Niewczas et al., 2021                          | 1 | 2 | 2 | 1 | 1 | 7 |
| Park et al., 2019                              | 1 | 2 | 2 | 1 | 1 | 7 |
| Pavelka et al., 2020                           | 1 | 2 | 2 | 2 | 1 | 8 |
| Peacock et al., 2018 <sup>a</sup>              | 1 | 1 | 2 | 2 | 1 | 7 |
| <sup>i</sup> Peacock et al., 2018 <sup>b</sup> | 1 | 1 | 1 | 0 | 1 | 4 |
| Petrou et al., 2021                            | 1 | 2 | 1 | 1 | 1 | 6 |
| Plush et al., 2021                             | 1 | 2 | 1 | 1 | 1 | 6 |
| Rahmani et al., 2017                           | 1 | 1 | 1 | 1 | 1 | 5 |
| Rainey., 2009                                  | 1 | 2 | 2 | 2 | 1 | 8 |
| Ruiz-Barquín et al., 2019                      | 1 | 2 | 1 | 1 | 1 | 6 |
| Richardson et al., 2021                        | 1 | 1 | 1 | 1 | 1 | 5 |
| Santos-Junior et al., 2020                     | 1 | 2 | 1 | 1 | 1 | 6 |
| Shin et al., 2014                              | 1 | 2 | 1 | 1 | 1 | 6 |
| Sinnett, Maglinti & Kingstone.,<br>2018        | 1 | 2 | 2 | 2 | 1 | 8 |
| Stephenson & Rossheim, 2018                    | 1 | 2 | 1 | 2 | 1 | 7 |
| Schild & Zettler., 2021                        | 1 | 2 | 1 | 1 | 1 | 6 |
| Stellpflug, Menton & LeFevere.,<br>2020        | 1 | 1 | 1 | 2 | 1 | 6 |
| Tabben et al., 2018                            | 1 | 1 | 2 | 2 | 1 | 7 |
| Tiernan et al., 2021                           | 1 | 1 | 1 | 1 | 1 | 5 |
| Tota et al., 2019                              | 1 | 1 | 2 | 2 | 1 | 7 |
| Wiechmann et al., 2016                         | 1 | 1 | 2 | 2 | 1 | 7 |

|                        |   |   |   |   |   |   |
|------------------------|---|---|---|---|---|---|
| Zebrowska et al., 2017 | 1 | 2 | 1 | 2 | 1 | 7 |
|------------------------|---|---|---|---|---|---|

<sup>i</sup>Peacock, C. A., Sanders, G. J., Antonio, J., & Silver, T. A. (2018). The reporting of a multifaceted mixed martial arts strength and conditioning program. *Journal of Exercise Physiology Online*, 21(1), 86-91.
