# Supplementary material for: Exploratory Systematic Review of Mixed Martial Arts: An Overview of Performance of Importance Factors with over 20,000 Athletes
Source: Sports (Basel). 2022 May 24;10(6):80. doi: 10.3390/sports10060080 (PMC9227211; doi:10.3390/sports10060080)
Supplement: Supplementary file 1 [file sports-10-00080-s001.zip]

Archive with 4 entries (4 files):
- Table S1 risk bias.pdf
- Table S2 application riskbias.pdf
- Table S3 Main findings regarding studies.pdf
- Table S4 Summary of studies reporting Effect Size.pdf
